# Supplementary material for: A gene cluster in Ginkgo biloba encodes unique multifunctional cytochrome P450s that initiate ginkgolide biosynthesis
Source: PubMed Central journal article supplement (PMC9436924; doi:10.1038/s41467-022-32879-9), 2022-09-01
Supplement: 41467_2022_32879_MOESM3_ESM.pdf [file 41467_2022_32879_MOESM3_ESM.pdf]

## **Description of Additional Supplementary Files**

File Name: Supplementary Data 1

Description: GbCYPs transiently co-expressed with GbLPS in *Nicotiana benthamiana*

File Name: Supplementary Data 2

Description: Primers used to amplify promoter sequences and additional primers used for *Saccharomyces cerevisiae*

File Name: Supplementary Data 3

Description: Codon optimized *Ginkgo biloba* sequences for yeast expression
